# Supplementary material for: The Effect of Virtual Reality on Preoperative Anxiety: A Meta-Analysis of Randomized Controlled Trials
Source: MDPI journal article supplement (doi:10.3390/jcm9103151), 2020-09-29
Supplement: s1 [file s1]

**Table S1.** Search strategies for each database.

| Database       | Order | Keywords                                                                                                                                                                                                                                                                                                                                                                                                               | Results |
|----------------|-------|------------------------------------------------------------------------------------------------------------------------------------------------------------------------------------------------------------------------------------------------------------------------------------------------------------------------------------------------------------------------------------------------------------------------|---------|
| PubMed         | #1    | ("elective surgical procedures"[MH] OR surgery[MH] OR surgery[TIAB]) OR ("Anesthesia"[MH] OR anesthesia[TIAB] OR anaesthesia[TIAB] OR anesth*[TIAB] OR anaesth*[TIAB])                                                                                                                                                                                                                                                 | 3927681 |
|                | #2    | "virtual reality"[MH] OR "virtual reality"[TIAB]                                                                                                                                                                                                                                                                                                                                                                       | 10378   |
|                | #3    | #1 AND #2                                                                                                                                                                                                                                                                                                                                                                                                              | 2580    |
|                | #4    | #3 AND HSSS(S)                                                                                                                                                                                                                                                                                                                                                                                                         | 732     |
| EMBASE         | #1    | Surgery/exp OR surgery:ab,ti OR anesthesia:exp OR anesthesia:ab,ti OR anaesthesia:ab,ti OR anesth*:ab,ti OR anaesth*:ab,ti                                                                                                                                                                                                                                                                                             | 5726915 |
|                | #2    | 'virtual reality'/exp OR 'virtual reality':ab,ti                                                                                                                                                                                                                                                                                                                                                                       | 20579   |
|                | #3    | #1 AND #2                                                                                                                                                                                                                                                                                                                                                                                                              | 5273    |
|                | #4    | 'crossover procedure'/exp OR 'crossover procedure' OR 'double blind procedure'/exp OR 'double blind procedure' OR 'randomized controlled trial'/exp OR 'randomized controlled trial' OR 'single blind procedure'/exp OR 'single blind procedure' OR random* OR factorial* OR crossover* OR 'cross over' OR 'cross-over' OR placebo* OR (doubl* AND blind*) OR (singl* AND blind*) OR assign* OR allocat* OR volunteer* | 2587811 |
|                | #5    | #3 AND #4                                                                                                                                                                                                                                                                                                                                                                                                              | 865     |
|                | #6    | #5 AND [embase]/lim                                                                                                                                                                                                                                                                                                                                                                                                    | 786     |
| CENTRAL        | #1    | [mh "elective surgical procedures"] OR [mh "general surgery"] OR surgery:ti,ab,kw OR [mh anesthesia] OR anesthesia:ti,ab,kw OR anaesthesia:ti,ab,kw OR anesth*:ti,ab,kw OR anaesth*:ti,ab,kw                                                                                                                                                                                                                           | 237521  |
|                | #2    | [mh "virtual reality"] OR "virtual reality":ti,ab,kw                                                                                                                                                                                                                                                                                                                                                                   | 2932    |
|                | #3    | #1 AND #2                                                                                                                                                                                                                                                                                                                                                                                                              | 509     |
|                | #4    | #3 AND Trials                                                                                                                                                                                                                                                                                                                                                                                                          | 506     |
| CINAHL         | S1    | MH(Surgery, Elective+)                                                                                                                                                                                                                                                                                                                                                                                                 | 1944    |
|                | S2    | MH(Surgery, Operative+)                                                                                                                                                                                                                                                                                                                                                                                                | 211371  |
|                | S3    | TI (surgery) OR AB(surgery)                                                                                                                                                                                                                                                                                                                                                                                            | 79736   |
|                | S4    | MH(anesthesia+) OR TI(anesth*) OR AB(anesth*) OR TI(anaesth*) OR AB(anaesth*)                                                                                                                                                                                                                                                                                                                                          | 21598   |
|                | S5    | S1 OR S2 OR S3 OR S4                                                                                                                                                                                                                                                                                                                                                                                                   | 254624  |
|                | S6    | MH(Virtual Reality+) OR TI(virtual reality) OR AB(virtual reality)                                                                                                                                                                                                                                                                                                                                                     | 3041    |
|                | S7    | S5 AND S6                                                                                                                                                                                                                                                                                                                                                                                                              | 542     |
|                | S8    | MH(Clinical Trials) OR PT(Clinical trial) OR TX (clinic* n1 trial*) OR TX ( (singl* n1 blind*) OR (singl* n1 mask*) ) OR TX ( (doubl* n1 blind*) OR (doubl* n1 mask*) ) OR TX ( (trebl* n1 blind*) OR (trebl* n1 mask*) ) OR TX ( (trebl* n1 blind*) or (trebl* n1 mask*) ) OR TX (randomi* control* trial*) OR MH(Random Assignment) OR TX(random* allocat*) OR TX(placebo*)                                          | 586436  |
|                | S9    | S7 AND S8                                                                                                                                                                                                                                                                                                                                                                                                              | 106     |
| Scopus         | #1    | (INDEXTERMS(elective surgical procedures) OR INDEXTERMS(surgery) OR TITLE-ABS(sugery)) OR (INDEXTERMS(anesthesia) OR TITLE-ABS(anesthesia) OR TITLE-ABS(anaesthesia) OR TITLE-ABS(anesth*) OR TITLE-ABS(anaesth*))                                                                                                                                                                                                     | 1857596 |
|                | #2    | INDEXTERMS(virtual reality) OR TITLE-ABS(virtual reality)                                                                                                                                                                                                                                                                                                                                                              | 128389  |
|                | #3    | #1 AND #2                                                                                                                                                                                                                                                                                                                                                                                                              | 5215    |
|                | #4    | (INDEXTERMS(randomized controlled trial) OR INDEXTERMS(controlled clinical trial) OR TITLE-ABS(randomized) OR TITLE-ABS(placebo) OR INDEXTERMS(drug therapy) OR TITLE-ABS(randomly) OR TITLE-ABS(trial) OR TITLE-ABS(groups)) AND NOT (INDEXTERMS(animals) AND NOT INDEXTERMS(humans))                                                                                                                                 | 9284998 |
|                | #5    | #3 AND #4                                                                                                                                                                                                                                                                                                                                                                                                              | 965     |
| Web of Science | #1    | TS=(surgery OR anesthesia OR anaesthesia OR anesth* OR anaesth*)                                                                                                                                                                                                                                                                                                                                                       | 1378220 |
|                | #2    | TS=("virtual reality")                                                                                                                                                                                                                                                                                                                                                                                                 | 21372   |
|                | #3    | #1 AND #2                                                                                                                                                                                                                                                                                                                                                                                                              | 2723    |
|                | #4    | TS=(random* OR blind* OR allocat* OR assign* OR trial* OR placebo* OR crossover OR cross-over* OR intervention)                                                                                                                                                                                                                                                                                                        | 4147905 |
|                | #5    | #3 AND #4                                                                                                                                                                                                                                                                                                                                                                                                              | 869     |

**Table S2.** Details for judgement for each risk of bias for randomized controlled studies.

| Study        | Bias                                        | Author's judgement | Reason for judgement                                                                                                                                                                                       |
|--------------|---------------------------------------------|--------------------|------------------------------------------------------------------------------------------------------------------------------------------------------------------------------------------------------------|
| Bekelis 2017 | Random sequence generation (selection bias) | Low                | A block randomization design was used with randomly permuted block sizes of 4 on the basis of a computerized random-number generator with sequentially numbered opaque, sealed envelopes for each stratum. |
|              | Allocation concealment (selection bias)     | Low                |                                                                                                                                                                                                            |
|              | Blinding (detection bias)                   | Low                | The physicians conducting the interviews to collect the primary and secondary outcome data, and the data analysts were blinded to the group assignments.                                                   |
|              | Incomplete outcome data (attrition bias)    | Low                | Some patients were excluded from the final analysis in both groups, but reasons for this are both reported and balance across groups.                                                                      |
|              | Selective reporting (reporting bias)        | Low                | All pre-specified and expected outcomes are reported.                                                                                                                                                      |
|              | Other bias                                  | Low                | No other bias was detected.                                                                                                                                                                                |
| Dehghan 2019 | Random sequence generation (selection bias) | Low                | Allocations to groups were performed randomly by assigning patients with even hospital bed numbers in the interventional group and those with odd hospital bed numbers in the control group.               |
|              | Allocation concealment (selection bias)     | Unclear            |                                                                                                                                                                                                            |
|              | Blinding (detection bias)                   | Unclear            | Not described                                                                                                                                                                                              |
|              | Incomplete outcome data (attrition bias)    | Low                | All patients completed the study and there were no losses.                                                                                                                                                 |
|              | Selective reporting (reporting bias)        | Low                | All pre-specified and expected outcomes are reported.                                                                                                                                                      |
|              | Other bias                                  | Low                | No other bias was detected.                                                                                                                                                                                |
| Eijlers 2019 | Random sequence generation (selection bias) | Low                | Block randomization was performed, stratified by type of surgery.                                                                                                                                          |
|              | Allocation concealment (selection bias)     | Unclear            |                                                                                                                                                                                                            |
|              | Blinding (detection bias)                   | Low                | Assessments after randomization were performed by the blinded researcher, blinded recovery nurse.                                                                                                          |
|              | Incomplete outcome data (attrition bias)    | Low                | Patients in VR group discontinued intervention, but the outcomes were analyzed as intention-to-treat.                                                                                                      |
|              | Selective reporting (reporting bias)        | Low                | All pre-specified and expected outcomes are reported.                                                                                                                                                      |
|              | Other bias                                  | Low                | No other bias was detected.                                                                                                                                                                                |
| Haisley 2020 | Random sequence generation (selection bias) | Low                | Patients were then randomized via computer software to the VR or the non-VR arm.                                                                                                                           |
|              | Allocation concealment (selection bias)     | Unclear            |                                                                                                                                                                                                            |
|              | Blinding (detection bias)                   | Unclear            | Not described                                                                                                                                                                                              |
|              | Incomplete outcome data (attrition bias)    | Low                | All patients completed the study and there were no losses.                                                                                                                                                 |

|                |                                             |         |                                                                                                                                                            |
|----------------|---------------------------------------------|---------|------------------------------------------------------------------------------------------------------------------------------------------------------------|
|                | Selective reporting (reporting bias)        | Low     | All pre-specified and expected outcomes are reported.                                                                                                      |
|                | Other bias                                  | Low     | No other bias was detected.                                                                                                                                |
| Noben 2019     | Random sequence generation (selection bias) | Low     | Randomization was performed by the researcher using a Web-based computer randomizer generating a randomization list. Randomization blocks of 10 were used. |
|                | Allocation concealment (selection bias)     | Unclear | Not described                                                                                                                                              |
|                | Blinding (detection bias)                   | Unclear | Not described                                                                                                                                              |
|                | Incomplete outcome data (attrition bias)    | Low     | Outcomes were reported for all patients.                                                                                                                   |
|                | Selective reporting (reporting bias)        | Low     | All pre-specified and expected outcomes are reported.                                                                                                      |
|                | Other bias                                  | Low     | No other bias was detected.                                                                                                                                |
| Robertson 2017 | Random sequence generation (selection bias) | Low     | They were then randomly allocated into one of three groups using a random number generator.                                                                |
|                | Allocation concealment (selection bias)     | Low     | Patient randomization numbers were concealed in opaque envelopes that were opened by the study investigator                                                |
|                | Blinding (detection bias)                   | Low     | Participants were not made aware of their allocated group until after their response to the initial HADS.                                                  |
|                | Incomplete outcome data (attrition bias)    | Low     | Outcomes were reported for all patients.                                                                                                                   |
|                | Selective reporting (reporting bias)        | Low     | All pre-specified and expected outcomes are reported.                                                                                                      |
|                | Other bias                                  | Low     | No other bias was detected.                                                                                                                                |
| Ryu 2017       | Random sequence generation (selection bias) | Low     | Randomization was performed by an independent anaesthetist not otherwise involved in the trial.                                                            |
|                | Allocation concealment (selection bias)     | Low     | A computer-generated randomization code (Random Allocation Software version 1.0) with opaque envelopes containing sequential numbers was used.             |
|                | Blinding (detection bias)                   | Low     | A single-blinded assessor collected the observational scores to maintain consistency and uniformity.                                                       |
|                | Incomplete outcome data (attrition bias)    | Low     | One patient discontinued intervention due to acceptable reason.                                                                                            |
|                | Selective reporting (reporting bias)        | Low     | All pre-specified and expected outcomes are reported.                                                                                                      |
|                | Other bias                                  | Low     | No other bias was detected.                                                                                                                                |
| Ryu 2018       | Random sequence generation (selection bias) | Low     | Using a computer-generated randomization code, the enrolled patients were randomly allocated to one of two groups.                                         |
|                | Allocation concealment (selection bias)     | Low     | An opaque envelope containing sequential numbers                                                                                                           |
|                | Blinding (detection bias)                   | Low     | All outcomes were assessed by a blind single evaluator                                                                                                     |
|                | Incomplete outcome data (attrition bias)    | Low     | One patient allocated to the VR group was excluded due to acceptable reason.                                                                               |
|                | Selective reporting                         | Low     | All pre-specified and expected outcomes are reported.                                                                                                      |

|           |                                             |         |                                                                                                                |
|-----------|---------------------------------------------|---------|----------------------------------------------------------------------------------------------------------------|
|           | (reporting bias)<br>Other bias              | Low     | No other bias was detected.                                                                                    |
| Ryu 2019  | Random sequence generation (selection bias) | Low     | A computer-generated randomized code with nontransparent envelopes that contained sequential numbers was used. |
|           | Allocation concealment (selection bias)     | Low     |                                                                                                                |
|           | Blinding (detection bias)                   | Low     | The outcome assessor and an anesthesiologist were blinded to group assignment.                                 |
|           | Incomplete outcome data (attrition bias)    | Low     | Three patients were losses to follow-up, but acceptable reason was described.                                  |
|           | Selective reporting (reporting bias)        | Low     | All pre-specified and expected outcomes are reported.                                                          |
|           | Other bias                                  | Low     | No other bias was detected.                                                                                    |
| Yang 2019 | Random sequence generation (selection bias) | Low     | Patients were randomized into 2 groups using a computer-generated random sequence.                             |
|           | Allocation concealment (selection bias)     | Unclear |                                                                                                                |
|           | Blinding (detection bias)                   | Low     | The single assessor collecting the outcome data was blinded to the study group assignments.                    |
|           | Incomplete outcome data (attrition bias)    | Low     | All patients completed the study and there were no losses.                                                     |
|           | Selective reporting (reporting bias)        | Low     | All pre-specified and expected outcomes are reported.                                                          |
|           | Other bias                                  | Low     | No other bias was detected.                                                                                    |

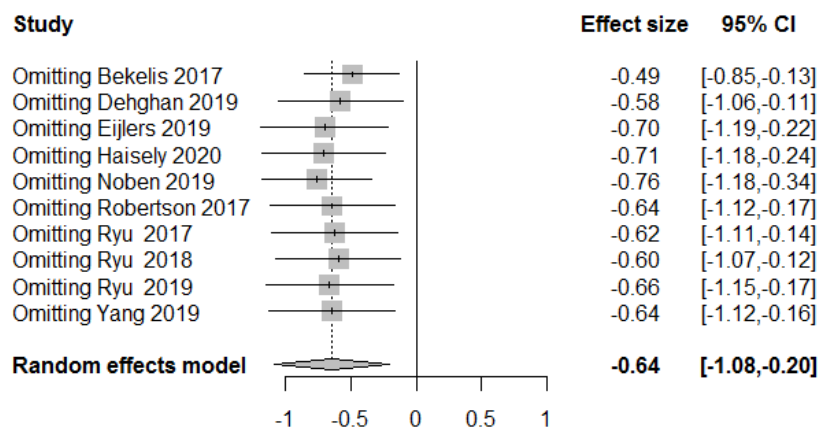

**Figure S1.** Sensitivity analysis of preoperative anxiety.

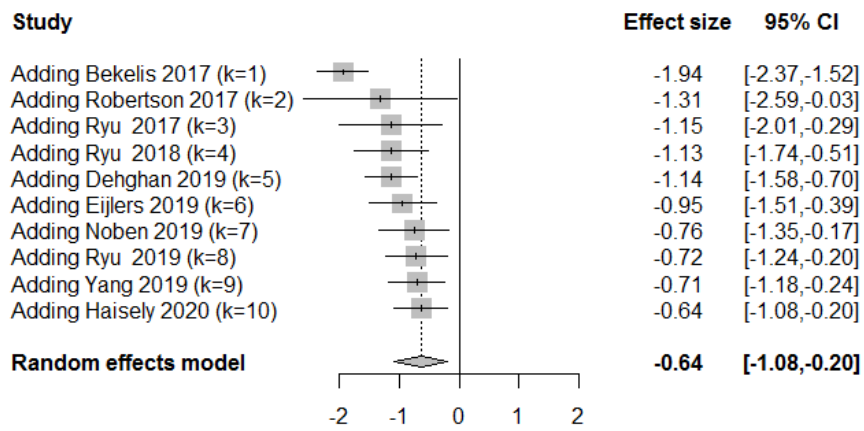

**Figure S2.** Cumulative meta-analysis of preoperative anxiety.

**Supplementary data 1:** The results of likelihood or empirical Bayesian method.

1. Likelihood based model

A) Preoperative anxiety

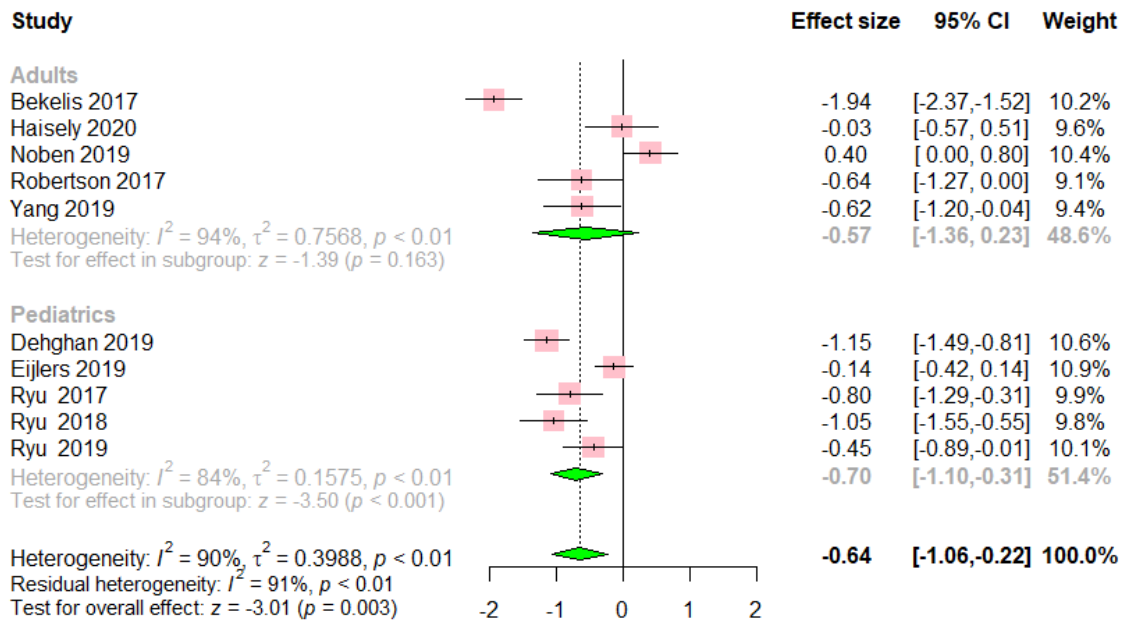

B) Satisfaction

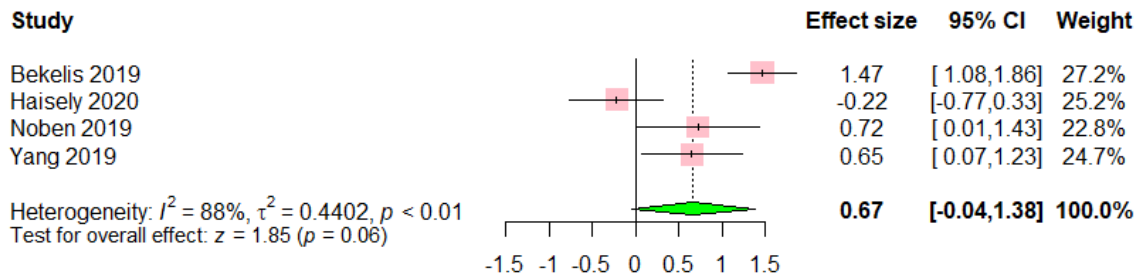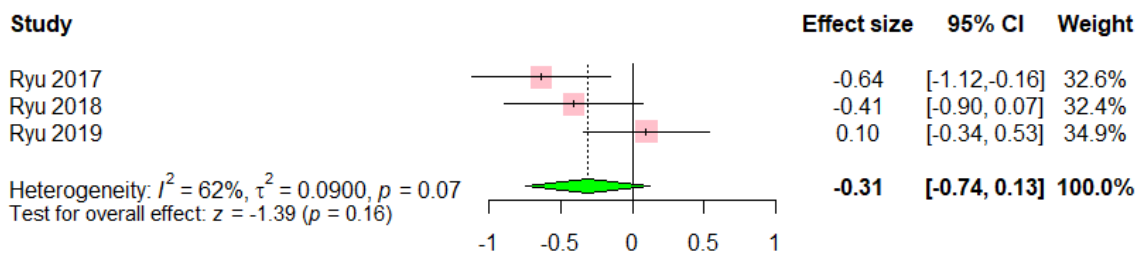

C) Behavior disturbances

## 2. Empirical Bayesian methods

### A) Preoperative anxiety

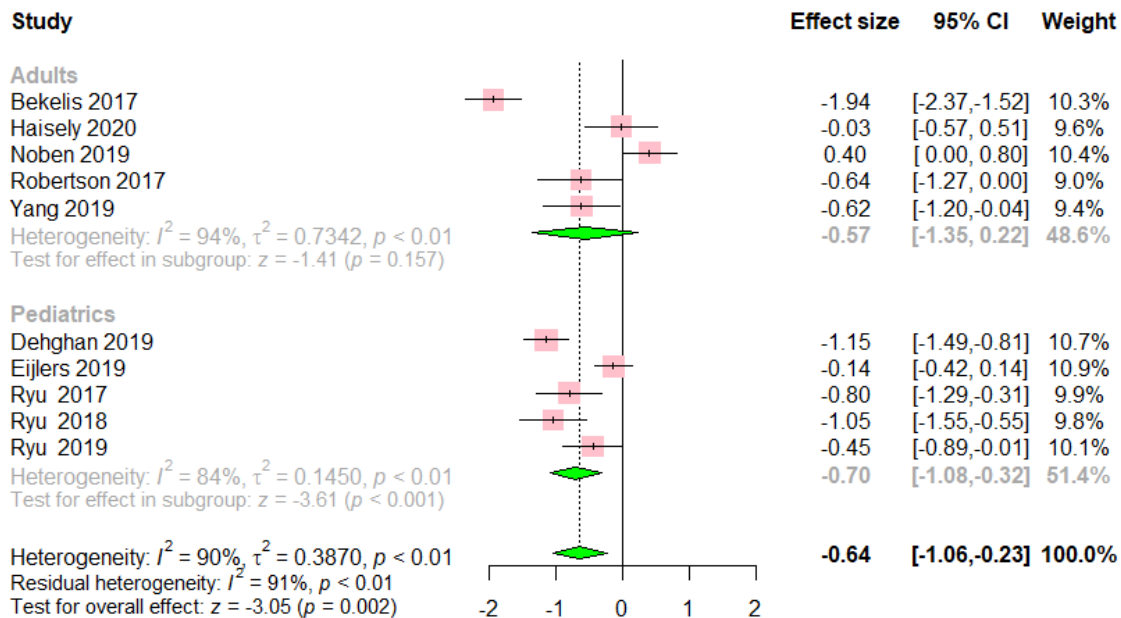

### B) Satisfaction

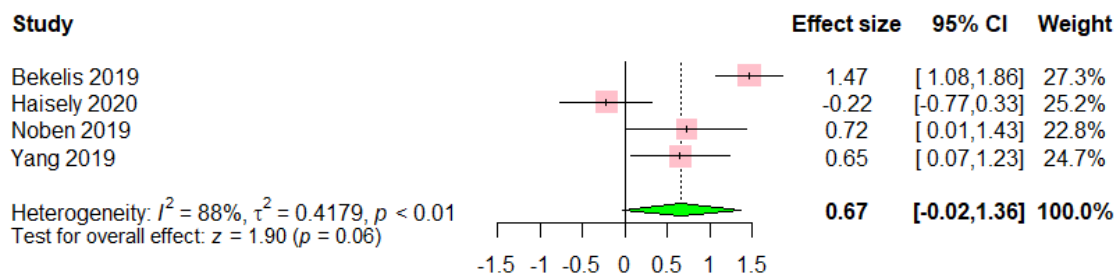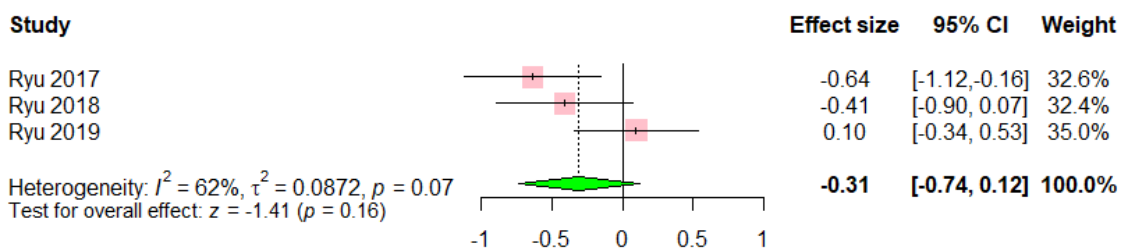

### C) Behavior disturbances
